# Supplementary material
Source: PubMed Central journal article supplement (PMC2777103)
Supplement: E09-03-0225_1.pdf [file E09-03-0225_1.pdf]

**Supplemental Figure S1.** Examples of fluorescence microscopy and Om45-GFP

processing from the mitophagy screen. (A) Wild-type (WT; BY4742) and knockout strains expressing Om45-GFP were cultured in YPL medium for three days to allow growth to the post-log phase, and were then observed for vacuolar GFP fluorescence. The wild-type strain showed a clear level of vacuolar GFP, *egd1Δ* showed a very weak vacuolar GFP signal and *atg32Δ* showed no vacuolar GFP signal. (B) Wild-type and *sti1Δ* strains expressing Om45-GFP were cultured in YPL medium for 12 h and then starved in SD-N for 6 h. The cell lysates equivalent to  $A_{600} = 0.2$  units of cells were subjected to immunoblot analysis with anti-YFP antibody. Although no processed GFP was observed in the *sti1Δ* strain after 6 h starvation, we cannot conclude whether it is the result of a defect in mitophagy or a low level of Om45-GFP expression.

**Supplemental Figure S2.** Screen for defects in macroautophagy and the Cvt pathway. (A)

Wild-type (WT; BY4742) and the indicated mutant strains expressing Pho8Δ60 were grown in YPD and shifted to SD-N for 4 h. Samples were collected and protein extracts assayed for Pho8Δ60 activity. The value for the wild-type strain was set to 100% and the other values were normalized. (B) Wild-type and the indicated mutant strains were cultured in YPD medium and analyzed for prApe1 maturation by immunoblotting to monitor the Cvt

pathway during vegetative growth. The positions of precursor and mature Ape1 are indicated.

**Supplemental Figure S3.** Idh1-GFP processing analysis for novel mutants. Wild-type (WT; BY4742) and the indicated mutant strains expressing Idh1-GFP were cultured in YPL medium for 12 h and then starved in SD-N for 6 h. The cell lysates equivalent to  $A_{600} = 0.2$  units of cells were subjected to immunoblot analysis with anti-YFP antibody and anti-Pgk1 antiserum as a loading control. The asterisks indicate non-specific bands that result from repeated use of the anti-YFP antibody.

**Supplemental Figure S4.** GFP-Atg8 processing analysis for novel mutants. Wild-type (WT, BY4742) and the indicated mutant strains expressing GFP-Atg8 were cultured in YPD medium to mid-log phase and then starved in SD-N for 2 and 4 h. The cell lysates equivalent to  $A_{600} = 0.2$  units of cells were subjected to immunoblot analysis with anti-YFP antibody.

**Supplemental Figure S5.** Subcellular localization of the mitophagy-related proteins identified from the screen. Each protein was chromosomally tagged with GFP and observed

with fluorescence microscopy as described in Materials and Methods. DIC, differential interference contrast.

**Supplemental Figure S6.** The Cvt pathway, pexophagy and cell growth are normal in the *ylr356w* $\Delta$  strain. (A) Wild-type (WT; SEY6210), *atg1* $\Delta$ , and *ylr356w* $\Delta$  strains were cultured in YPD medium and analyzed for prApe1 maturation by immunoblotting to monitor the Cvt pathway during vegetative growth. The positions of precursor and mature Ape1 are indicated. (B) GFP was integrated at the *PEX14* locus in wild-type (SEY6210), *atg1* $\Delta$ , and *ylr356w* $\Delta$  strains. Cells were grown in oleic acid-containing medium (YTO) for 19 h, then shifted to SD-N for the indicated times. Samples were collected and analyzed by immunoblot with antibody to YFP. (C) Wild-type (SEY6210) and *ylr356w* $\Delta$  strains expressing Om45-GFP were cultured in YPL medium for three days. The localization of GFP was visualized by fluorescence microscopy. DIC, differential interference contrast. (D) Wild-type (WT; SEY6210), *ylr356w* $\Delta$  and *icy2* $\Delta$  strains were cultured in YPD medium to mid-log phase and washed in sterile water. Equal numbers of cells suspended in sterile water were inoculated on YPD and YPL plates. Cells were diluted 1:5 in each step from left to right.

**Supplemental Figure S7.** Analysis of mitophagy in the *atg* mutant strains. The wild type (WT; TKYM22) and the indicated *atg* mutant strains expressing Om45-GFP were cultured in YPL medium for 12 h and then starved in SD-N for 6 h. The cell lysates equivalent to  $A_{600} = 0.2$  units of cells were subjected to immunoblot analysis with anti-YFP antibodies.

**Supplemental Figure S8. EM.** Electron microscopy of mitophagy during starvation and at post-log phase. The *pep4* $\Delta$  strain was cultured in YPL medium to growing phase, then shifted to SD-N and cultured for 6 h (A and B) or was cultured in YPL medium to stationary phase (for 50 h; C and D). Cells were prepared for electron microscopy using freeze substitution. The arrow marks an example of autophagosome containing a mitochondria and cytosolic components. AB, autophagic body including cytosolic components; M, autophagic body including mitochondria only; M+C, autophagic body including mitochondria and cytosolic components; Mit, mitochondria in cytosol; V, vacuole; N, nucleus. Scale bar, 500 nm.



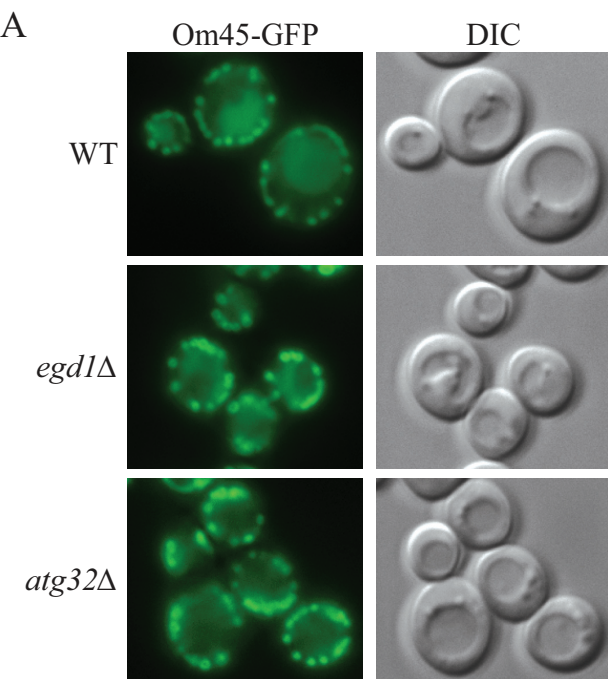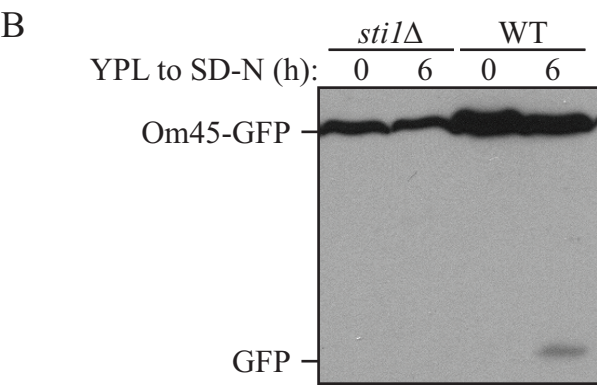

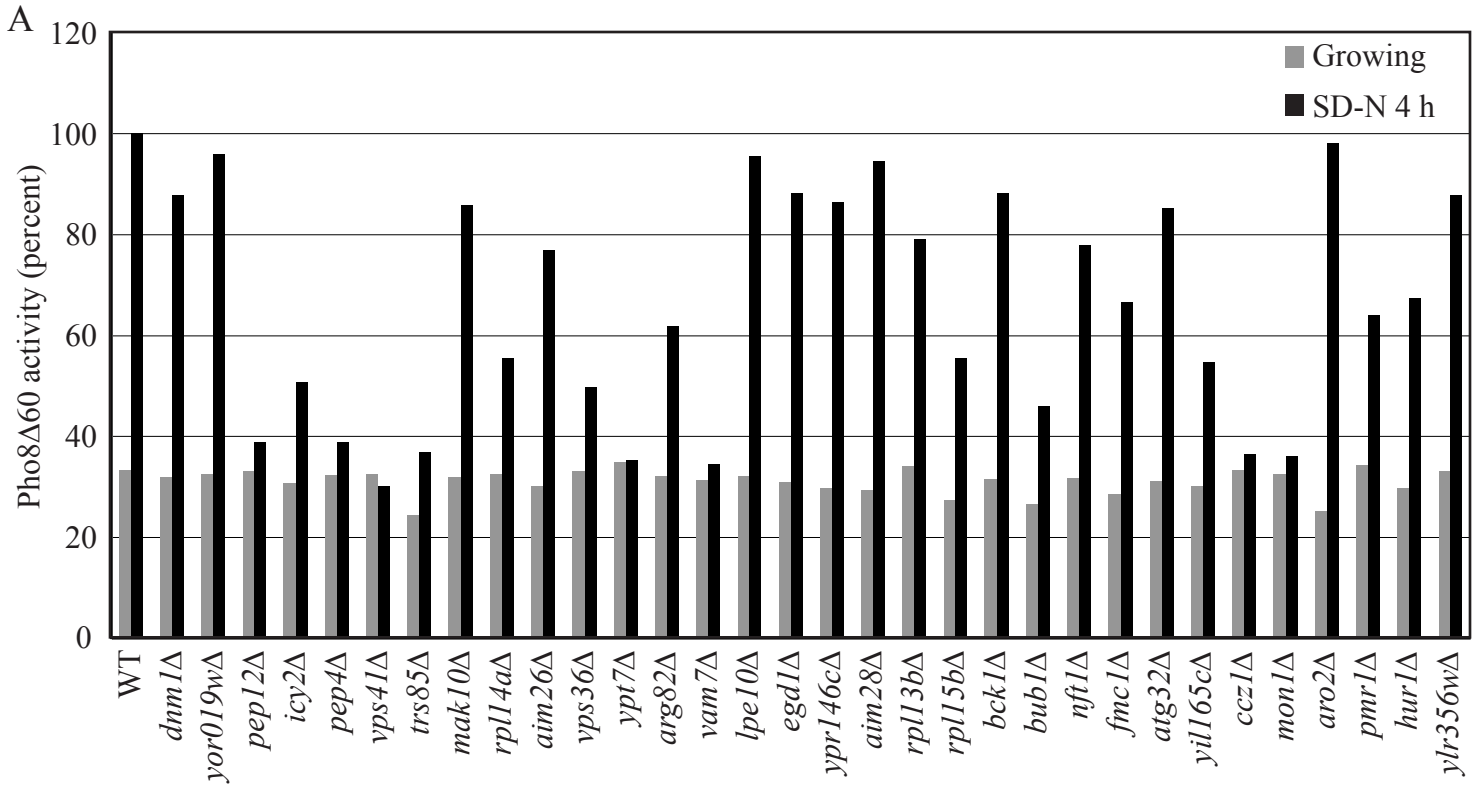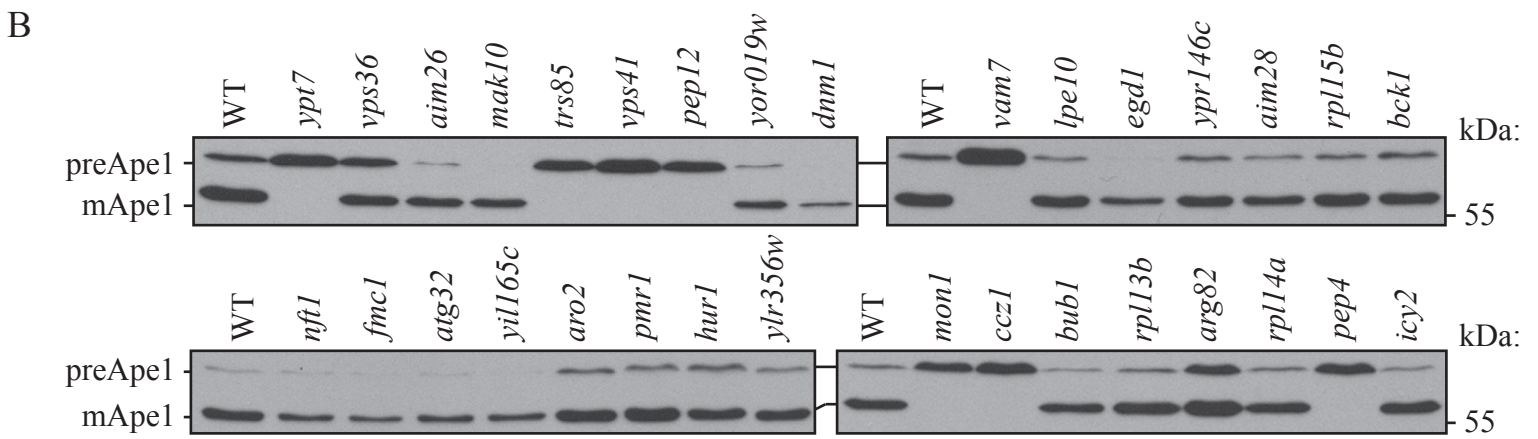

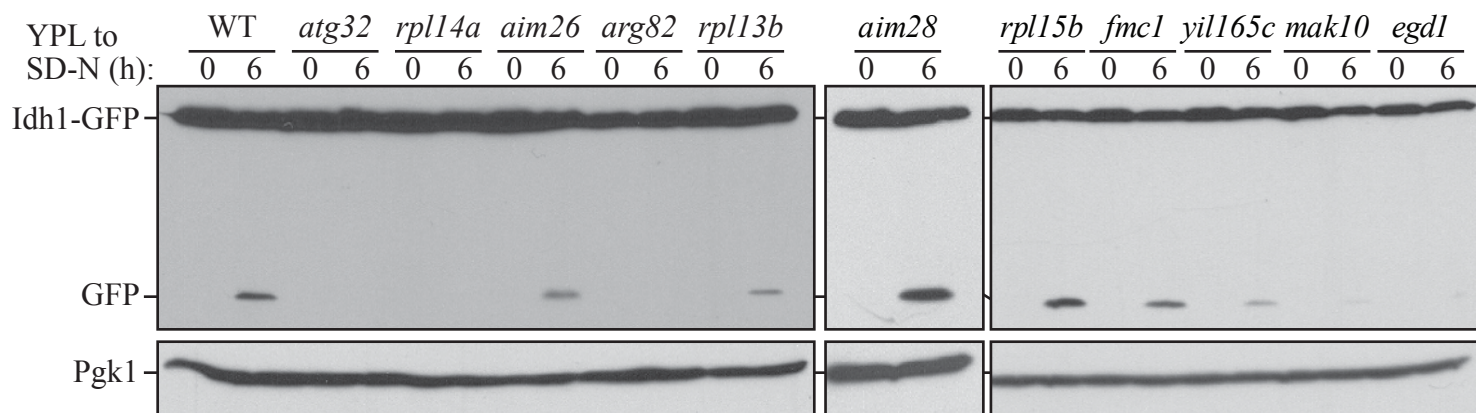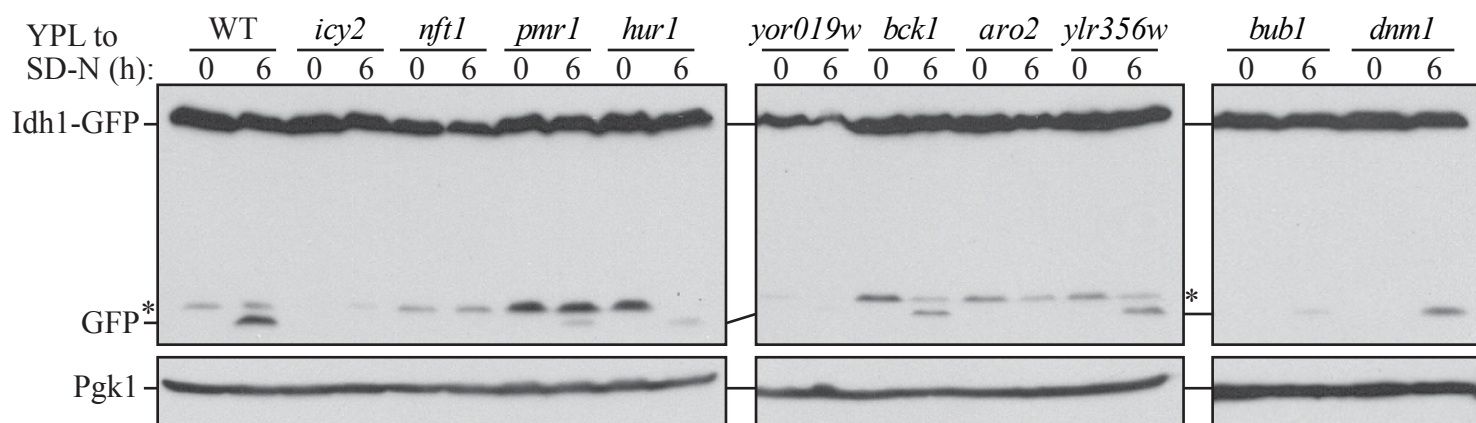



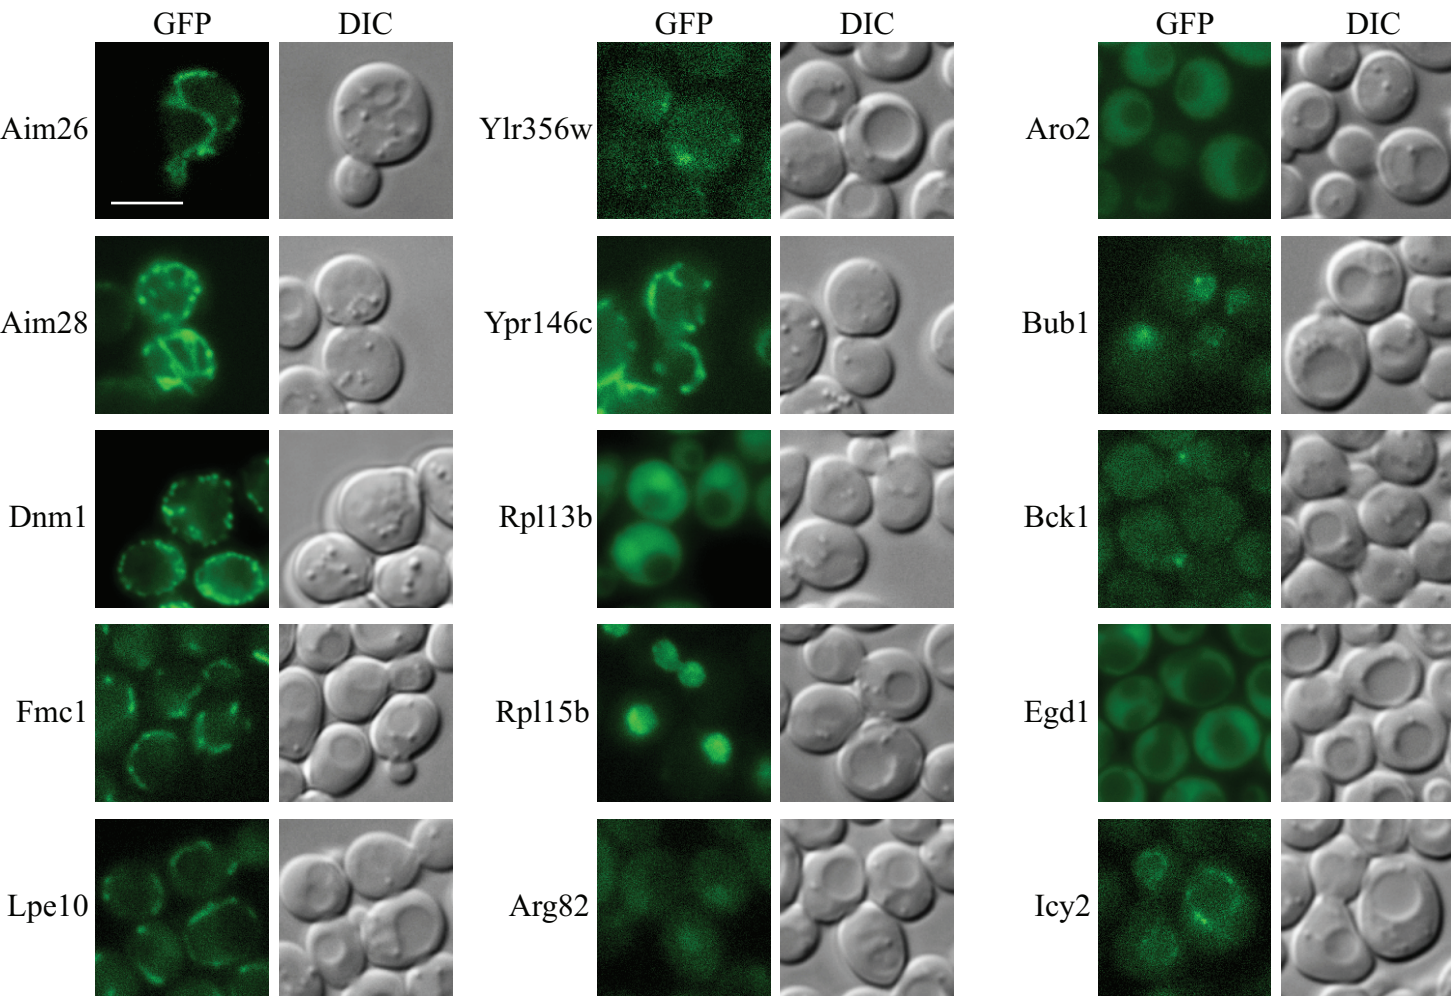



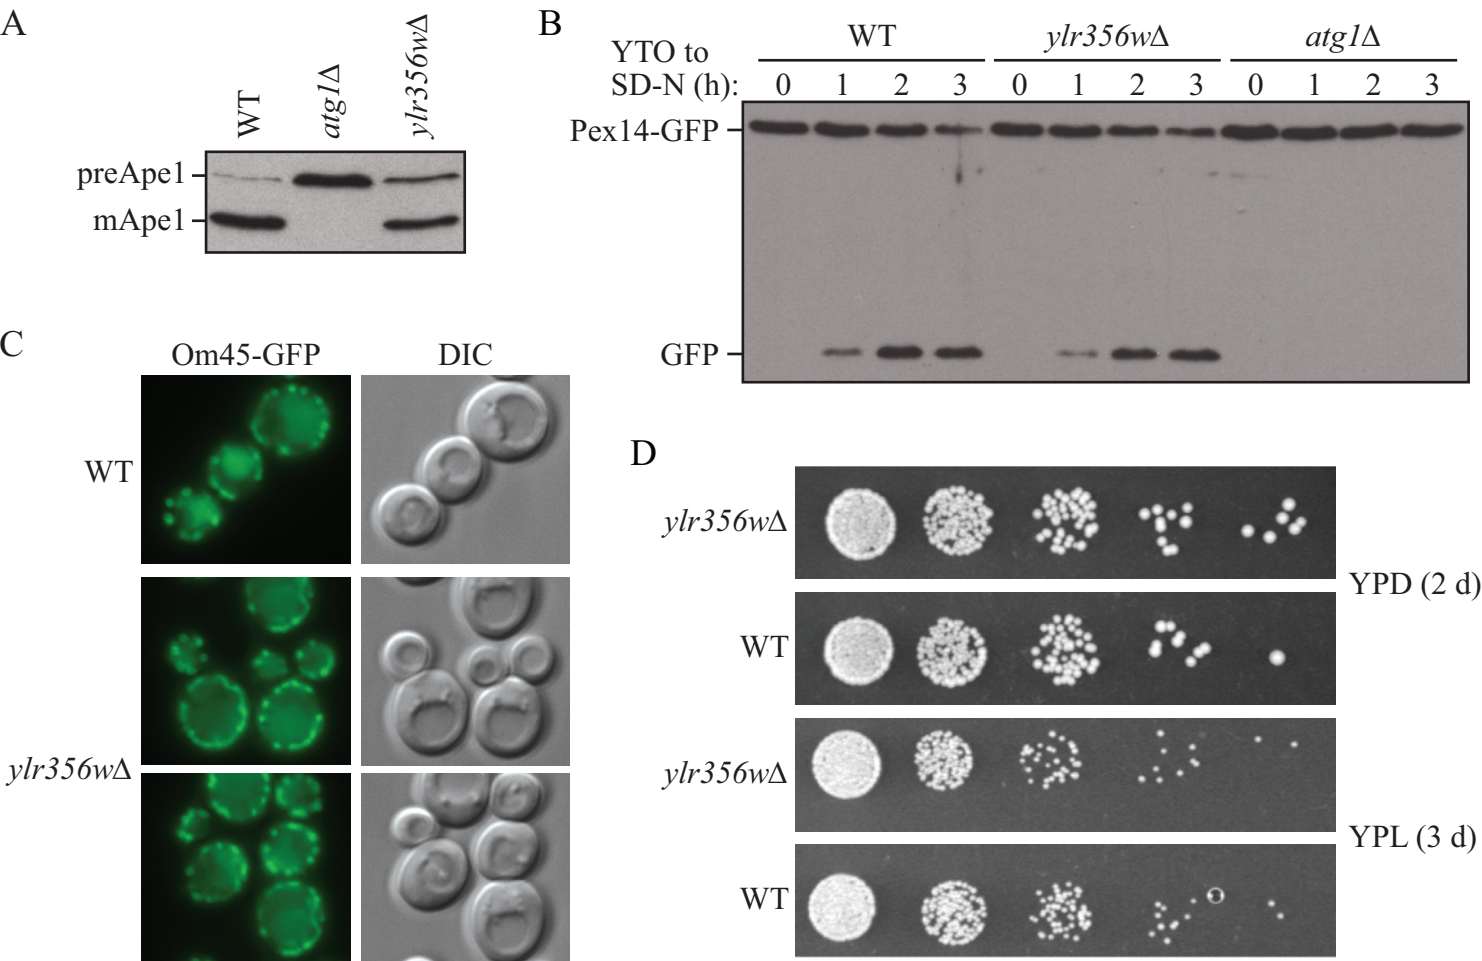

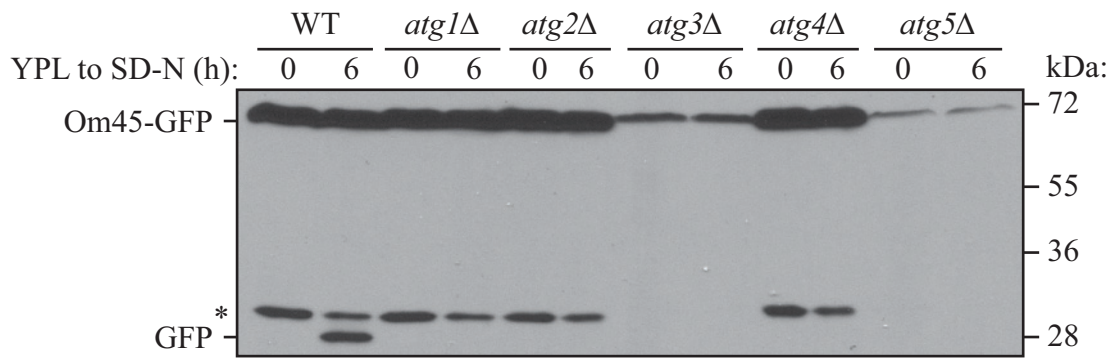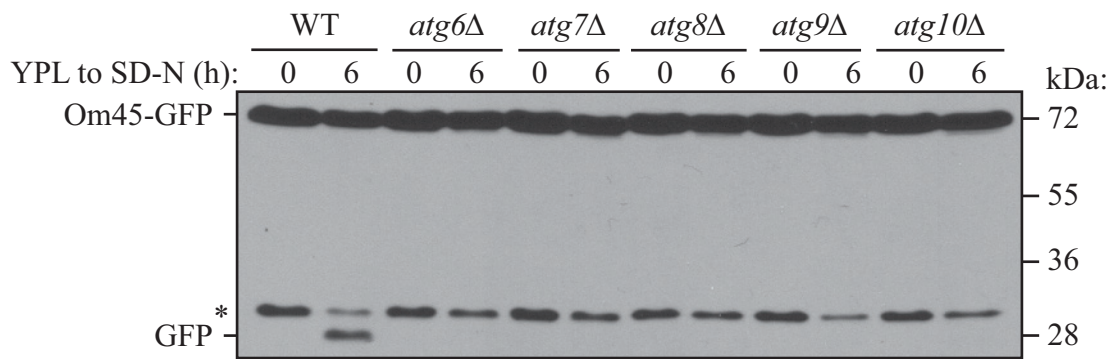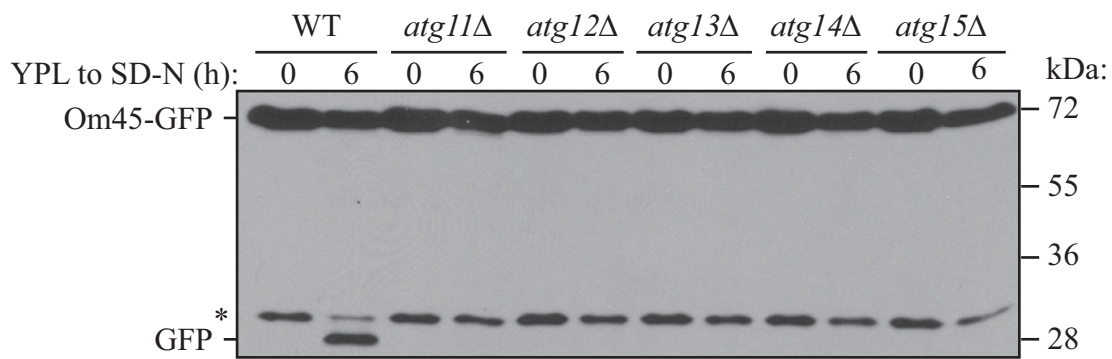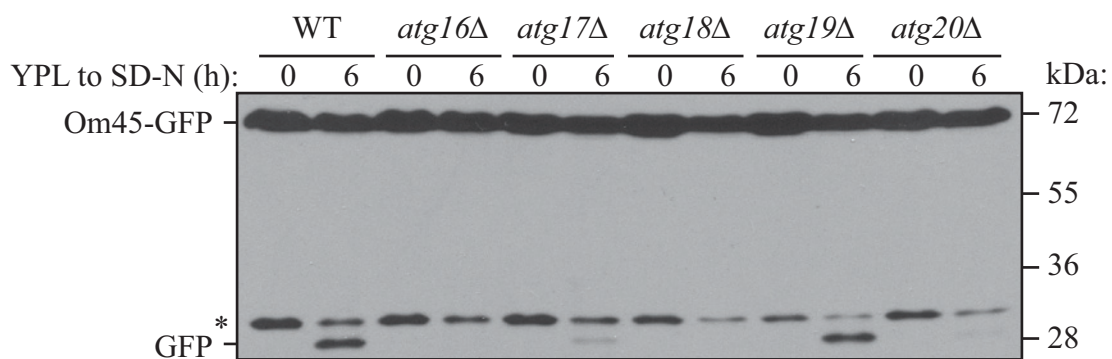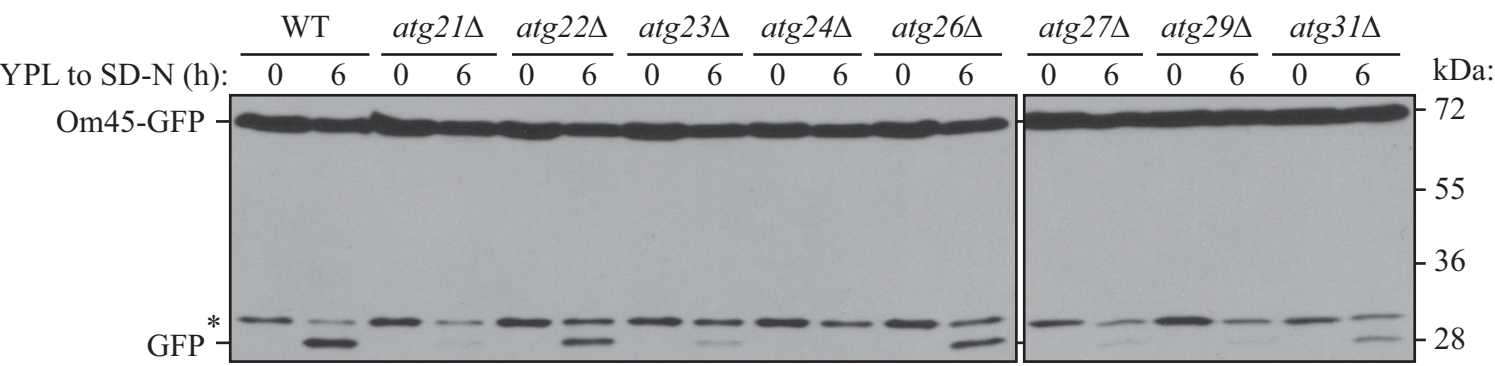



SD-N  
6 h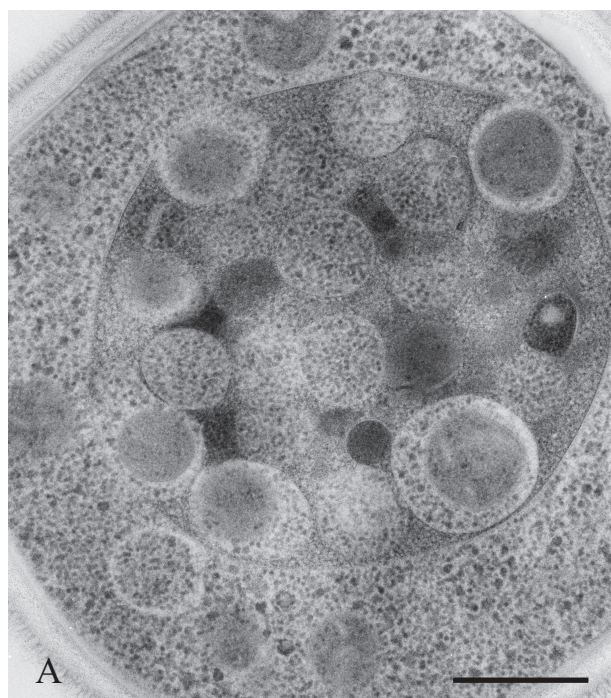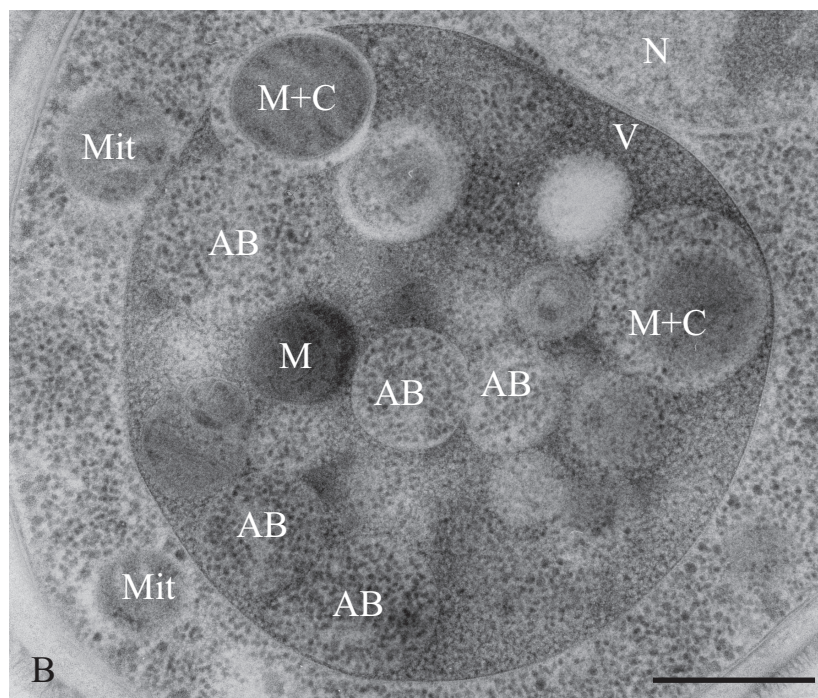YPL  
50 h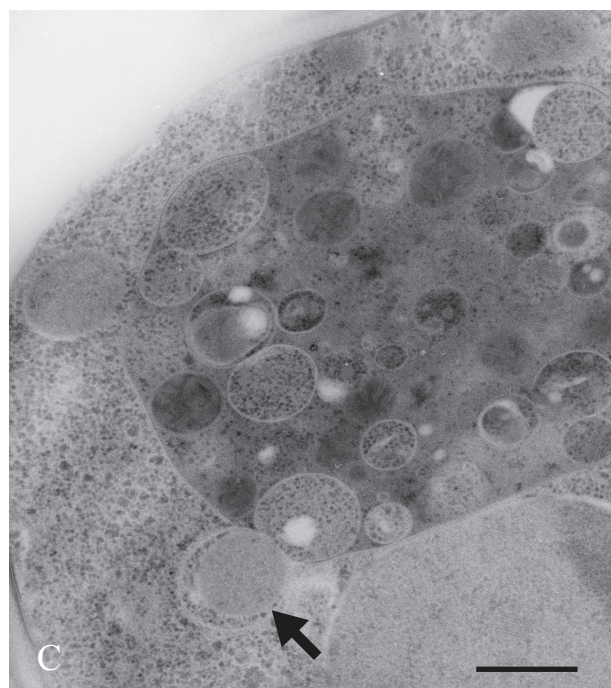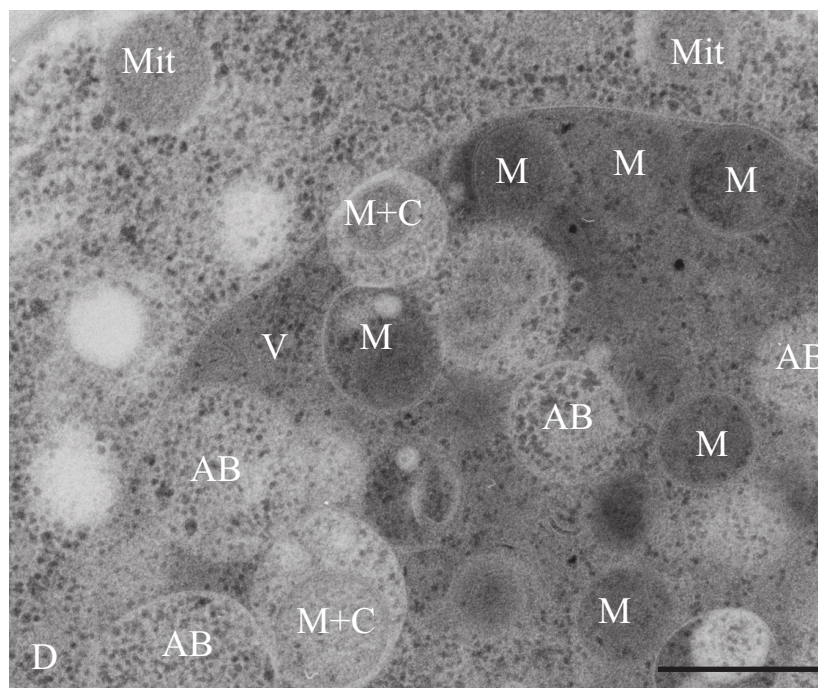



Table S1. Yeast strains used in this study.

| Strain | Genotype                                                                                    | Source     |
|--------|---------------------------------------------------------------------------------------------|------------|
| KWY20  | SEY6210 <i>pho8Δ::TRP1 pho13Δ::LEU2</i><br><br>pRS406- <i>ADHI-COX4-pho8Δ60</i>             | This study |
| KWY21  | SEY6210 <i>pho8Δ::TRP1 pho13Δ::LEU2</i><br><br>pRS406- <i>ADHI-COX4-pho8Δ60 atg1Δ::ble</i>  | This study |
| KWY22  | SEY6210 <i>pho8Δ::TRP1 pho13Δ::LEU2</i><br><br>pRS406- <i>ADHI-COX4-pho8Δ60 atg32Δ::KAN</i> | This study |
| KWY23  | SEY6210 <i>pho8Δ::TRP1 pho13Δ::LEU2</i><br><br>pRS406- <i>ADHI-COX4-pho8Δ60 aim26Δ::KAN</i> | This study |
| KWY24  | SEY6210 <i>pho8Δ::TRP1 pho13Δ::LEU2</i><br><br>pRS406- <i>ADHI-COX4-pho8Δ60 aim28Δ::KAN</i> | This study |
| KWY25  | SEY6210 <i>pho8Δ::TRP1 pho13Δ::LEU2</i><br><br>pRS406- <i>ADHI-COX4-pho8Δ60 dnm1Δ::KAN</i>  | This study |
| KWY26  | SEY6210 <i>pho8Δ::TRP1 pho13Δ::LEU2</i><br><br>pRS406- <i>ADHI-COX4-pho8Δ60 fmc1Δ::KAN</i>  | This study |
| KWY27  | SEY6210 <i>pho8Δ::TRP1 pho13Δ::LEU2</i>                                                     | This study |

|       |                                               |            |
|-------|-----------------------------------------------|------------|
|       | <i>pRS406-ADHI-COX4-pho8Δ60 lpe10Δ::KAN</i>   |            |
| KWY28 | SEY6210 <i>pho8Δ::TRP1 pho13Δ::LEU2</i>       | This study |
|       | <i>pRS406-ADHI-COX4-pho8Δ60 ypr146cΔ::KAN</i> |            |
| KWY29 | SEY6210 <i>pho8Δ::TRP1 pho13Δ::LEU2</i>       | This study |
|       | <i>pRS406-ADHI-COX4-pho8Δ60 ylr356wΔ::KAN</i> |            |
| KWY30 | SEY6210 <i>pho8Δ::TRP1 pho13Δ::LEU2</i>       | This study |
|       | <i>pRS406-ADHI-COX4-pho8Δ60 rpl13bΔ::KAN</i>  |            |
| KWY31 | SEY6210 <i>pho8Δ::TRP1 pho13Δ::LEU2</i>       | This study |
|       | <i>pRS406-ADHI-COX4-pho8Δ60 rpl15bΔ::KAN</i>  |            |
| KWY32 | SEY6210 <i>pho8Δ::TRP1 pho13Δ::LEU2</i>       | This study |
|       | <i>pRS406-ADHI-COX4-pho8Δ60 aro2Δ::KAN</i>    |            |
| KWY33 | SEY6210 <i>pho8Δ::TRP1 pho13Δ::LEU2</i>       | This study |
|       | <i>pRS406-ADHI-COX4-pho8Δ60 bck1Δ::KAN</i>    |            |
| KWY34 | SEY6210 <i>pho8Δ::TRP1 pho13Δ::LEU2</i>       | This study |
|       | <i>pRS406-ADHI-COX4-pho8Δ60 bub1Δ::KAN</i>    |            |
| KWY35 | SEY6210 <i>pho8Δ::TRP1 pho13Δ::LEU2</i>       | This study |
|       | <i>pRS406-ADHI-COX4-pho8Δ60 egd1Δ::KAN</i>    |            |

|       |                                                                                           |            |
|-------|-------------------------------------------------------------------------------------------|------------|
| KWY36 | SEY6210 <i>pho8Δ::TRP1 pho13Δ::LEU2</i><br>pRS406- <i>ADHI-COX4-pho8Δ60 icy2Δ::HIS5</i>   | This study |
| KWY37 | SEY6210 <i>pho8Δ::TRP1 pho13Δ::LEU2</i><br>pRS406- <i>ADHI-COX4-pho8Δ60 mak10Δ::KAN</i>   | This study |
| KWY38 | SEY6210 <i>pho8Δ::TRP1 pho13Δ::LEU2</i><br>pRS406- <i>ADHI-COX4-pho8Δ60 nft1Δ::KAN</i>    | This study |
| KWY39 | SEY6210 <i>pho8Δ::TRP1 pho13Δ::LEU2</i><br>pRS406- <i>ADHI-COX4-pho8Δ60 yil165cΔ::KAN</i> | This study |
| KWY40 | SEY6210 <i>pho8Δ::TRP1 pho13Δ::LEU2</i><br>pRS406- <i>ADHI-COX4-pho8Δ60 yor019wΔ::KAN</i> | This study |
| KWY41 | SEY6210 <i>OM45-GFP::TRP1 aim26Δ::KAN</i>                                                 | This study |
| KWY42 | SEY6210 <i>OM45-GFP::TRP1 aim28Δ::KAN</i>                                                 | This study |
| KWY43 | SEY6210 <i>OM45-GFP::TRP1 dnm1Δ::KAN</i>                                                  | This study |
| KWY44 | SEY6210 <i>OM45-GFP::TRP1 fmc1Δ::KAN</i>                                                  | This study |
| KWY45 | SEY6210 <i>OM45-GFP::TRP1 lpe10Δ::KAN</i>                                                 | This study |
| KWY46 | SEY6210 <i>OM45-GFP::TRP1 ypr146cΔ::KAN</i>                                               | This study |
| KWY47 | SEY6210 <i>OM45-GFP::TRP1 ylr356wΔ::KAN</i>                                               | This study |

|       |                                             |            |
|-------|---------------------------------------------|------------|
| KWY48 | SEY6210 <i>OM45-GFP::TRP1 rpl13bΔ::KAN</i>  | This study |
| KWY49 | SEY6210 <i>OM45-GFP::TRP1 rpl15bΔ::KAN</i>  | This study |
| KWY50 | SEY6210 <i>OM45-GFP::TRP1 aro2Δ::KAN</i>    | This study |
| KWY51 | SEY6210 <i>OM45-GFP::TRP1 bck1ΔΔ::KAN</i>   | This study |
| KWY52 | SEY6210 <i>OM45-GFP::TRP1 bub1Δ::KAN</i>    | This study |
| KWY53 | SEY6210 <i>OM45-GFP::TRP1 egd1Δ::KAN</i>    | This study |
| KWY54 | SEY6210 <i>OM45-GFP::TRP1 icy2Δ::KAN</i>    | This study |
| KWY55 | SEY6210 <i>OM45-GFP::TRP1 mak10Δ::KAN</i>   | This study |
| KWY56 | SEY6210 <i>OM45-GFP::TRP1 nft1Δ::KAN</i>    | This study |
| KWY57 | SEY6210 <i>OM45-GFP::TRP1 pmr1Δ::KAN</i>    | This study |
| KWY58 | SEY6210 <i>OM45-GFP::TRP1 hur1Δ::KAN</i>    | This study |
| KWY59 | SEY6210 <i>OM45-GFP::TRP1 yil165cΔ::KAN</i> | This study |
| KWY60 | SEY6210 <i>OM45-GFP::TRP1 yor019wΔ::KAN</i> | This study |
| KWY61 | SEY6210 <i>AIM26-GFP::TRP1</i>              | This study |
| KWY62 | SEY6210 <i>AIM28-GFP::TRP1</i>              | This study |
| KWY63 | SEY6210 <i>DNM1-GFP::TRP1</i>               | This study |
| KWY64 | SEY6210 <i>FMCI-GFP::TRP1</i>               | This study |

|         |                                                                                                                                                     |                            |
|---------|-----------------------------------------------------------------------------------------------------------------------------------------------------|----------------------------|
| KWY65   | SEY6210 <i>LPE10-GFP::TRP1</i>                                                                                                                      | This study                 |
| KWY66   | SEY6210 <i>YPR146C-GFP::TRP1</i>                                                                                                                    | This study                 |
| KWY67   | SEY6210 <i>RPL13B-GFP::TRP1</i>                                                                                                                     | This study                 |
| KWY68   | SEY6210 <i>RPL15B-GFP::TRP1</i>                                                                                                                     | This study                 |
| KWY69   | SEY6210 <i>ARG82-GFP::TRP1</i>                                                                                                                      | This study                 |
| KWY70   | SEY6210 <i>ARO2-GFP::TRP1</i>                                                                                                                       | This study                 |
| KWY71   | SEY6210 <i>BCK1-GFP::TRP1</i>                                                                                                                       | This study                 |
| KWY72   | SEY6210 <i>BUB1-GFP::TRP1</i>                                                                                                                       | This study                 |
| KWY73   | SEY6210 <i>EGD1-GFP::TRP1</i>                                                                                                                       | This study                 |
| SEY6210 | MAT $\alpha$ <i>his3-<math>\Delta</math>200 leu2-3,112 lys2-801</i><br><br><i>trp1-<math>\Delta</math>901 ura3-52 suc2-<math>\Delta</math>9 GAL</i> | (Robinson et al., 1988)    |
| TKY28   | SEY6210 <i>pep4<math>\Delta</math>::LEU2</i>                                                                                                        | This study                 |
| TKYM22  | SEY6210 <i>OM45-GFP::TRP1</i>                                                                                                                       | (Kanki and Klionsky, 2008) |
| TKYM25  | SEY6210 <i>atg1<math>\Delta</math>::KanMX6 OM45-GFP::TRP1</i>                                                                                       | This study                 |
| TKYM36  | SEY6210 <i>atg8<math>\Delta</math>::HIS5 S.p. OM45-GFP::TRP1</i>                                                                                    | This study                 |
| TKYM37  | SEY6210 <i>atg5<math>\Delta</math>::LEU2 OM45-GFP::HIS3MX6</i>                                                                                      | This study                 |
| TKYM38  | SEY6210 <i>atg9<math>\Delta</math>::HIS5 S.p. OM45-GFP::TRP1</i>                                                                                    | This study                 |

|        |                                                                 |                            |
|--------|-----------------------------------------------------------------|----------------------------|
| TKYM39 | SEY6210 <i>atg11Δ::LEU2 OM45-GFP::TRP1</i>                      | This study                 |
| TKYM44 | SEY6210 <i>atg27Δ::TRP1 OM45-GFP::HIS3MX6</i>                   | This study                 |
| TKYM45 | SEY6210 <i>atg31Δ::HIS5 S.p.</i><br><br><i>OM45-GFP::KanMX6</i> | This study                 |
| TKYM47 | SEY6210 <i>atg17Δ::KanMX6</i><br><br><i>OM45-GFP::HIS3MX6</i>   | This study                 |
| TKYM49 | SEY6210 <i>atg29Δ::KanMX6</i><br><br><i>OM45-GFP::HIS3MX6</i>   | This study                 |
| TKYM50 | SEY6210 <i>IDH1-GFP::KanMX6</i>                                 | (Kanki and Klionsky, 2008) |
| TKYM53 | SEY6210 <i>atg20Δ::HIS5 S.p.</i><br><br><i>OM45-GFP::KanMX6</i> | This study                 |
| TKYM54 | SEY6210 <i>atg24Δ::HIS5 S.p.</i><br><br><i>OM45-GFP::KanMX6</i> | This study                 |
| TKYM57 | SEY6210 <i>atg23Δ::KanMX6 OM45-GFP::TRP1</i>                    | This study                 |
| TKYM62 | SEY6210 <i>atg19Δ::HIS5 S.p. OM45-GFP::TRP1</i>                 | This study                 |
| TKYM67 | SEY6210 <i>PEX14-GFP::KanMX6</i>                                | (Kanki and Klionsky, 2008) |
| TKYM72 | SEY6210 <i>atg1Δ::HIS5 S.p.</i>                                 | (Kanki and Klionsky, 2008) |

*PEX14-GFP::KanMX6*

TKYM80 SEY6210 *atg1Δ::HIS5 S.p. IDH1-GFP::TRP1* This study

TKYM167 SEY6210 *ylr356wΔ::HIS5 S.p.* This study

*OM45-GFP::TRP1*

TKYM170 SEY6210 *atg2Δ::HIS5 S.p. OM45-GFP::TRP1* This study

TKYM171 SEY6210 *atg3Δ::HIS5 S.p.* This study

*OM45-GFP::KanMX6*

TKYM172 SEY6210 *atg4Δ::LEU2* This study

*OM45-GFP::HIS3MX6*

TKYM173 SEY6210 *atg6Δ::LEU2 OM45-GFP::HIS3MX6* This study

TKYM174 SEY6210 *atg7Δ::HIS5 S.p. OM45-GFP::TRP1* This study

TKYM175 SEY6210 *atg10Δ::HIS5 S.p. OM45-GFP::TRP1* This study

TKYM176 SEY6210 *atg12Δ::KanMX6* This study

*OM45-GFP::HIS3MX6*

TKYM177 SEY6210 *atg13Δ::KanMX6* This study

*OM45-GFP::HIS3MX6*

TKYM178 SEY6210 *atg14Δ::LEU2 OM45-GFP::HIS3MX6* This study

|         |                                                               |            |
|---------|---------------------------------------------------------------|------------|
| TKYM179 | SEY6210 <i>atg15Δ::KanMX6</i><br><i>OM45-GFP::HIS3MX6</i>     | This study |
| TKYM180 | SEY6210 <i>atg16Δ::KanMX6 OM45-GFP::URA3</i>                  | This study |
| TKYM181 | SEY6210 <i>atg18Δ::KanMX6</i><br><i>OM45-GFP::HIS3MX6</i>     | This study |
| TKYM182 | SEY6210 <i>atg21Δ::HIS5 S.p. OM45-GFP::TRP1</i>               | This study |
| TKYM183 | SEY6210 <i>atg22Δ::TRP1 OM45-GFP::HIS3MX6</i>                 | This study |
| TKYM184 | SEY6210 <i>atg26Δ::URA3 OM45-GFP::HIS3MX6</i>                 | This study |
| TKYM186 | SEY6210 <i>icy2Δ::HIS5 S.p. OM45-GFP::TRP1</i>                | This study |
| TKYM187 | SEY6210 <i>icy2Δ::HIS5 S.p. PEX14-GFP::TRP1</i>               | This study |
| TKYM188 | SEY6210 <i>ylr356wΔ::HIS5 S.p.</i><br><i>PEX14-GFP:: TRP1</i> | This study |
| TKYM194 | SEY6210 <i>ylr356wΔ::HIS5 S.p. IDH1-GFP::TRP1</i>             | This study |
| TKYM195 | SEY6210 <i>icy2Δ::HIS5 S.p. IDH1-GFP::TRP1</i>                | This study |
| KWY007  | SEY6210 <i>atg1Δ::HIS5 S.p. ICY2-GFP::TRP1</i>                | This study |
| TKYM196 | SEY6210 <i>ylr356wΔ::HIS5 S.p.</i>                            | This study |
| TKYM197 | SEY6210 <i>icy2Δ::HIS5 S.p.</i>                               | This study |



|         |                                                                              |                     |
|---------|------------------------------------------------------------------------------|---------------------|
| TKYM199 | TN124 <i>ylr356wΔ::URA3</i>                                                  | This study          |
| TKYM200 | TN124 <i>icy2Δ::URA3</i>                                                     | This study          |
| TKYM201 | SEY6210 <i>KanMX6::GAL-YLR356W-GFP::TRP1</i>                                 | This study          |
| TKYM205 | SEY6210 <i>YLR356W-PA:: TRP1</i><br><br><i>OM45-GFP::URA3</i>                | This study          |
| TKYM206 | SEY6210 <i>YLR356W-PA:: TRP1</i><br><br><i>TIM23-13myc:: HIS5 S.p.</i>       | This study          |
| TN124   | MATa <i>leu2-3,112 ura3-52 trp1</i><br><br><i>pho8::pho8Δ60 pho13Δ::LEU2</i> | (Noda et al., 1995) |
| WLY176  | SEY6210 <i>pho13Δ pho8Δ60::HIS3</i>                                          | This study          |
| WLY192  | SEY6210 <i>pho13Δ::KAN pho8Δ60::URA3 atg1Δ::HIS5</i>                         | This study          |
| WLY233  | SEY6210 <i>pho13Δ pho8Δ60::HIS3 arg82Δ::KAN</i>                              | This study          |
| WLY234  | SEY6210 <i>pho13Δ pho8Δ60::HIS3 aim28Δ::KAN</i>                              | This study          |
| WLY235  | SEY6210 <i>pho13Δ pho8Δ60::HIS3 rpl14aΔ::KAN</i>                             | This study          |
| WLY236  | SEY6210 <i>pho13Δ pho8Δ60::HIS3 yor019wΔ::KAN</i>                            | This study          |
| WLY237  | SEY6210 <i>pho13Δ pho8Δ60::HIS3 icy2Δ::KAN</i>                               | This study          |
| WLY238  | SEY6210 <i>pho13Δ pho8Δ60::HIS3 hur1Δ::LEU2</i>                              | This study          |

|        |                                                   |            |
|--------|---------------------------------------------------|------------|
| WLY239 | SEY6210 <i>pho13Δ pho8Δ60::HIS3 fmc1Δ::KAN</i>    | This study |
| WLY240 | SEY6210 <i>pho13Δ pho8Δ60::HIS3 yil165cΔ::KAN</i> | This study |
| WLY241 | SEY6210 <i>pho13Δ pho8Δ60::HIS3 rpl15bΔ::KAN</i>  | This study |
| WLY242 | SEY6210 <i>pho13Δ pho8Δ60::HIS3 ylr356wΔ::KAN</i> | This study |
| WLY243 | SEY6210 <i>pho13Δ pho8Δ60::HIS3 atg32Δ::KAN</i>   | This study |
| WLY244 | SEY6210 <i>pho13Δ pho8Δ60::HIS3 bck1Δ::KAN</i>    | This study |
| WLY245 | SEY6210 <i>pho13Δ pho8Δ60::HIS3 aim26Δ::KAN</i>   | This study |
| WLY246 | SEY6210 <i>pho13Δ pho8Δ60::HIS3 nft1Δ::KAN</i>    | This study |
| WLY247 | SEY6210 <i>pho13Δ pho8Δ60::HIS3 ypr146cΔ::KAN</i> | This study |
| WLY248 | SEY6210 <i>pho13Δ pho8Δ60::HIS3 mak10Δ::KAN</i>   | This study |
| WLY249 | SEY6210 <i>pho13Δ pho8Δ60::HIS3 egd1Δ::KAN</i>    | This study |
| WLY250 | SEY6210 <i>pho13Δ pho8Δ60::HIS3 dnm1Δ::KAN</i>    | This study |
| WLY251 | SEY6210 <i>pho13Δ pho8Δ60::HIS3 aro2Δ::KAN</i>    | This study |
| WLY252 | SEY6210 <i>pho13Δ pho8Δ60::HIS3 bub1Δ::KAN</i>    | This study |
| WLY253 | SEY6210 <i>pho13Δ pho8Δ60::HIS3 lpe10Δ::KAN</i>   | This study |
| WLY254 | SEY6210 <i>pho13Δ pho8Δ60::HIS3 pmr1Δ::KAN</i>    | This study |

Kanki, T., and D.J. Klionsky. 2008. Mitophagy in yeast occurs through a selective mechanism. *J Biol Chem.* 283:32386-93.

Noda, T., A. Matsuura, Y. Wada, and Y. Ohsumi. 1995. Novel system for monitoring autophagy in the yeast *Saccharomyces cerevisiae*. *Biochem Biophys Res Commun.* 210:126-32.

Robinson, J.S., D.J. Klionsky, L.M. Banta, and S.D. Emr. 1988. Protein sorting in *Saccharomyces cerevisiae*: isolation of mutants defective in the delivery and processing of multiple vacuolar hydrolases. *Mol Cell Biol.* 8:4936-48.

Table S3. Summary of autophagy analyses.

| Systematic<br>Name | Gene                 | Mitophagy                    |                               |                                  |                               |
|--------------------|----------------------|------------------------------|-------------------------------|----------------------------------|-------------------------------|
|                    |                      | Om45-GFP<br>BY4742<br>Fig. 2 | Om45-GFP<br>SEY6210<br>Fig. 3 | mitoPho8Δ60<br>SEY6210<br>Fig. 4 | Idh1-GFP<br>BY4742<br>Fig. S3 |
| <i>YKL037W</i>     | <i>AIM26</i>         | ++                           | +                             | +                                | ++                            |
| <i>YKR016W</i>     | <i>AIM28</i>         | -                            | -                             | No defect                        | No defect                     |
| <i>YLL001W</i>     | <i>DNM1</i>          | -                            | ++                            | ++                               | +                             |
| <i>YIL146C</i>     | <i>ATG32</i>         | -                            | -                             | -                                | -                             |
| <i>YIL098C</i>     | <i>FMC1</i>          | -                            | -                             | -                                | ++                            |
| <i>YPL060W</i>     | <i>LPE10</i>         | +                            | ++                            | No defect                        | N.D.                          |
| <i>YLR356W</i>     | <i>YLR356W/ATG33</i> | ++                           | -                             | ++                               | +                             |
| <i>YPR146C</i>     | <i>YPR146C</i>       | +                            | -                             | No defect                        | N.D.                          |
| <i>YMR142C</i>     | <i>RPL13B</i>        | ++                           | ++                            | +                                | +                             |
| <i>YKL006W</i>     | <i>RPL14A</i>        | -                            | N.D.                          | N.D.                             | -                             |
| <i>YMR121C</i>     | <i>RPL15B</i>        | -                            | No defect                     | No defect                        | No defect                     |
| <i>YDR173C</i>     | <i>ARG82</i>         | +                            | N.D.                          | N.D.                             | -                             |
| <i>YGL148W</i>     | <i>ARO2</i>          | -                            | -                             | -                                | -                             |
| <i>YJL095W</i>     | <i>BCK1</i>          | +                            | -                             | -                                | +                             |
| <i>YGR188C</i>     | <i>BUB1</i>          | +                            | +                             | ++                               | -                             |
| <i>YPL037C</i>     | <i>EGD1</i>          | +                            | -                             | No defect                        | -                             |
| <i>YPL250C</i>     | <i>ICY2</i>          | -                            | -                             | No defect                        | -                             |
| <i>YEL053C</i>     | <i>MAK10</i>         | ++                           | +                             | +                                | -                             |
| <i>YKR103W</i>     | <i>NFT1</i>          | +                            | -                             | No defect                        | -                             |
| <i>YGL167C*</i>    | <i>PMR1</i>          | -                            | +                             | N.D.                             | +                             |
| <i>YGL168W*</i>    | <i>HUR1</i>          | +                            | ++                            | N.D.                             | +                             |
| <i>YIL165C</i>     | <i>YIL165C</i>       | -                            | No defect                     | No defect                        | +                             |
| <i>YOR019W</i>     | <i>YOR019W</i>       | +                            | ++                            | ++                               | -                             |
| <i>YOR036W</i>     | <i>PEP12</i>         | -                            | N.D.                          | N.D.                             | N.D.                          |
| <i>YPL154C</i>     | <i>PEP4</i>          | -                            | N.D.                          | N.D.                             | N.D.                          |
| <i>YDR080W</i>     | <i>VPS41</i>         | -                            | N.D.                          | N.D.                             | N.D.                          |
| <i>YDR108W</i>     | <i>TRS85/GSG1</i>    | -                            | N.D.                          | N.D.                             | N.D.                          |
| <i>YLR417W</i>     | <i>VPS36</i>         | +                            | N.D.                          | N.D.                             | N.D.                          |
| <i>YML001W</i>     | <i>YPT7</i>          | -                            | N.D.                          | N.D.                             | N.D.                          |
| <i>YGL212W</i>     | <i>VAM7</i>          | -                            | N.D.                          | N.D.                             | N.D.                          |
| <i>YBR131W</i>     | <i>CCZ1</i>          | -                            | N.D.                          | N.D.                             | N.D.                          |
| <i>YGL124C</i>     | <i>MON1</i>          | -                            | N.D.                          | N.D.                             | N.D.                          |

++: slight defect

+: severe defect

-: complete defect

N.D.: not determined

\**YGL167C* and *YGL168W* partially overlap

Table S3. Summary of autophagy analyses (cont).

| <b>Gene</b>          | <b>Macroautophagy Cvt</b>   |                            |                    |                |
|----------------------|-----------------------------|----------------------------|--------------------|----------------|
|                      | Pho8 $\Delta$ 60<br>SEY6210 | Pho8 $\Delta$ 60<br>BY4742 | GFP-Atg8<br>BY4742 | Ape1<br>BY4742 |
|                      | Fig. 5                      | Fig. S2                    | Fig. S4            | Fig. S2        |
| <i>AIM26</i>         | ++                          | ++                         | No defect          | No defect      |
| <i>AIM28</i>         | No defect                   | No defect                  | No defect          | No defect      |
| <i>DNM1</i>          | No defect                   | No defect                  | No defect          | No defect      |
| <i>ATG32</i>         | No defect                   | No defect                  | No defect          | No defect      |
| <i>FMC1</i>          | ++                          | ++                         | No defect          | No defect      |
| <i>LPE10</i>         | No defect                   | No defect                  | No defect          | No defect      |
| <i>YLR356W/ATG33</i> | No defect                   | No defect                  | No defect          | No defect      |
| <i>YPR146C</i>       | No defect                   | No defect                  | No defect          | No defect      |
| <i>RPL13B</i>        | N.D.                        | No defect                  | No defect          | No defect      |
| <i>RPL14A</i>        | +                           | ++                         | No defect          | No defect      |
| <i>RPL15B</i>        | No defect                   | ++                         | No defect          | No defect      |
| <i>ARG82</i>         | No defect                   | ++                         | N.D.               | No defect      |
| <i>ARO2</i>          | No defect                   | No defect                  | N.D.               | No defect      |
| <i>BCK1</i>          | ++                          | No defect                  | No defect          | No defect      |
| <i>BUB1</i>          | ++                          | +                          | No defect          | No defect      |
| <i>EGD1</i>          | ++                          | No defect                  | No defect          | No defect      |
| <i>ICY2</i>          | +                           | +                          | No defect          | No defect      |
| <i>MAK10</i>         | No defect                   | No defect                  | No defect          | No defect      |
| <i>NFT1</i>          | ++                          | No defect                  | No defect          | No defect      |
| <i>PMR1</i>          | No defect                   | ++                         | No defect          | No defect      |
| <i>HUR1</i>          | No defect                   | ++                         | No defect          | No defect      |
| <i>YIL165C</i>       | ++                          | ++                         | No defect          | No defect      |
| <i>YOR019W</i>       | No defect                   | No defect                  | N.D.               | No defect      |
| <i>PEP12</i>         | N.D.                        | -                          | N.D.               | -              |
| <i>PEP4</i>          | N.D.                        | -                          | N.D.               | -              |
| <i>VPS41</i>         | N.D.                        | -                          | N.D.               | -              |
| <i>TRS85/GSG1</i>    | N.D.                        | -                          | N.D.               | -              |
| <i>VPS36</i>         | N.D.                        | +                          | N.D.               | +              |
| <i>YPT7</i>          | N.D.                        | -                          | N.D.               | -              |
| <i>VAM7</i>          | N.D.                        | -                          | N.D.               | -              |
| <i>CCZ1</i>          | N.D.                        | -                          | N.D.               | -              |
| <i>MON1</i>          | N.D.                        | -                          | N.D.               | -              |
